# Supplementary material for: Introduction to the SPARC Reanalysis Intercomparison Project (S-RIP) and overview of the reanalysis systems
Source: Copernicus journal article supplement (doi:10.5194/acp-17-1417-2017), 2017-01-31
Supplement: Supplementary file 1 [file acp-17-1417-2017-supplement.zip]

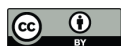

## *Supplement of*

# **Introduction to the SPARC Reanalysis Intercomparison Project (S-RIP) and overview of the reanalysis systems**

**Masatomo Fujiwara et al.**

*Correspondence to:* Jonathon S. Wright ([jswright@tsinghua.edu.cn](mailto:jswright@tsinghua.edu.cn)) and Masatomo Fujiwara ([fuji@ees.hokudai.ac.jp](mailto:fuji@ees.hokudai.ac.jp))

- [acp-17-1417-2017-supplement-title-page.pdf](#)
- S-RIP\_data
  - S-RIP\_assimilated\_data.xlsx
  - S-RIP\_boundary\_conditions\_rv1.xlsx
  - S-RIP\_streams\_rv2.xlsx
  - S-RIP\_verticalgrids\_rv2.xlsx
  - SSU\_AMSUA\_weighting\_functions.zip

The copyright of individual parts of the supplement might differ from the CC BY 3.0 License.
